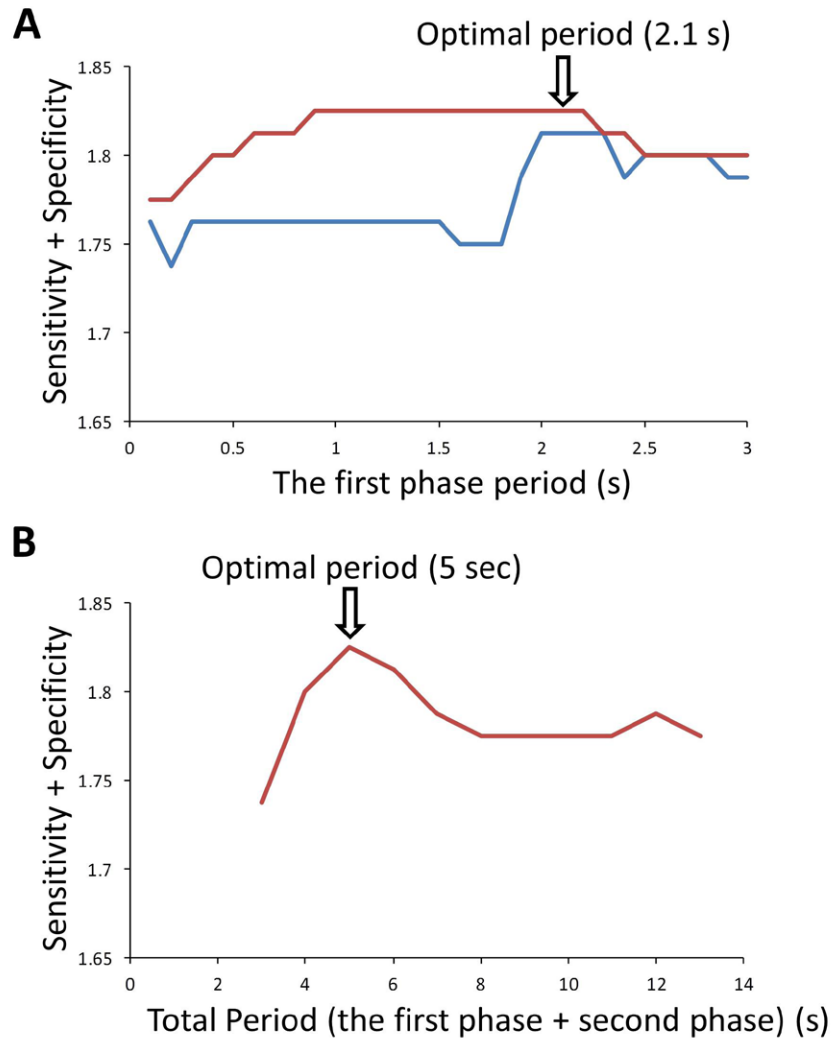

**Fig. S1. Optimal periods for parameter calculations.** (A) Different cut-off periods (0.1~3.0 seconds) and (B) total periods (3~13 seconds) were tested using the sum of sensitivity and specificity. Arrows indicate the optimal cut-off period (2.1 s) and total period (5 s). Red and blue lines represent the feeding behaviours on crab and fish, respectively. There was only the feeding behaviour on crab in the total period (B) because both of the two parameters used for identifying the feeding behaviour on fish were based on the first phase.

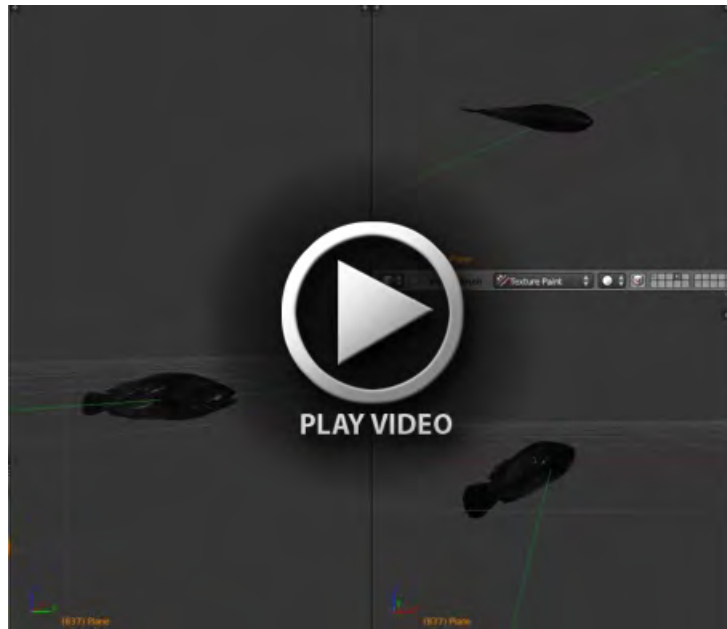

**Movie 1. The body motion during the feeding behaviour on crab (crab-eating), reconstructed through the 3-axis accelerations and 3-axis angular velocities datasets.** The data were taken at 200 Hz and the animation is played at 10 Hz. Note that the distance moved is not incorporated in the animation because estimation errors are significant when the acceleration values are relatively low during crab-eating.

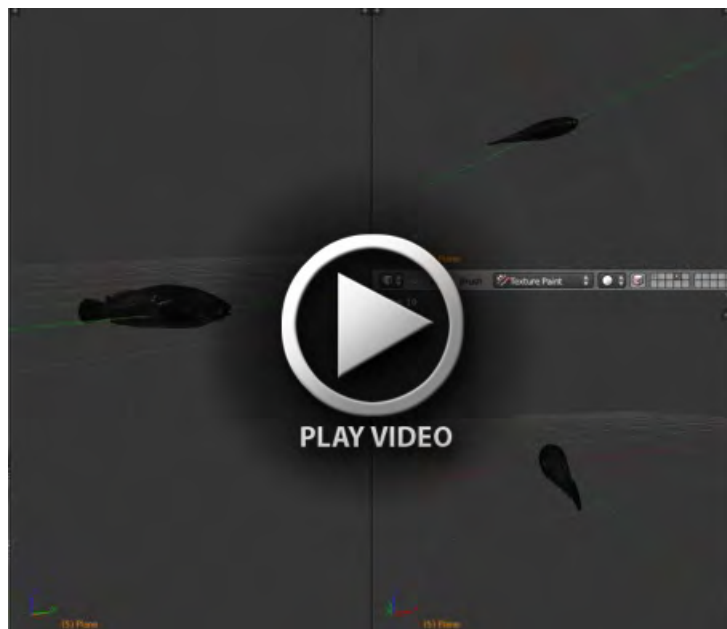

**Movie 2. The body motion during the feeding behaviour on fish (fish-eating), reconstructed through the 3-axis accelerations and 3-axis angular velocities datasets.** The data were taken at 200 Hz and the animation is played at 10 Hz. Note that the cumulative distance is incorporated in the animation because the acceleration values are relatively high during fish-eating.

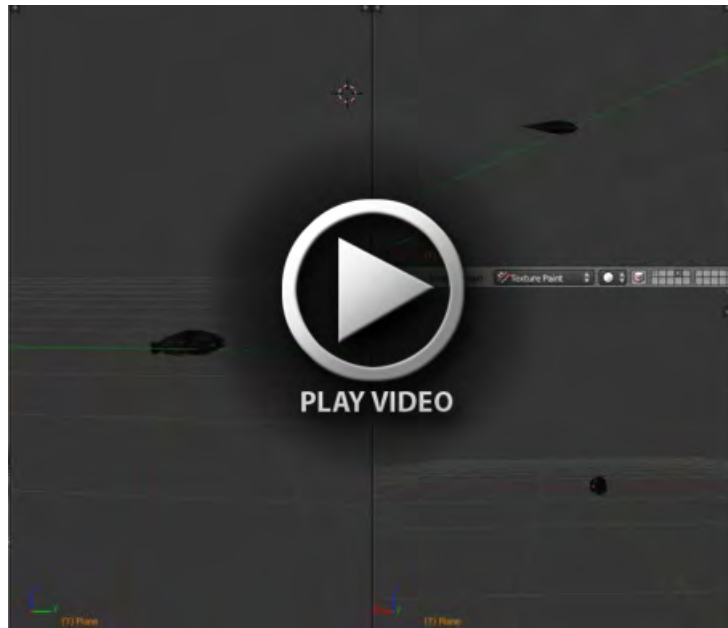

**Movie 3. The body motion during the escape response (escape), reconstructed through the 3-axis accelerations and 3-axis angular velocities datasets.** The data were taken at 200 Hz and the animation is played at 10 Hz. Note that the cumulative distance is incorporated in the animation because the acceleration values are relatively high during escape.

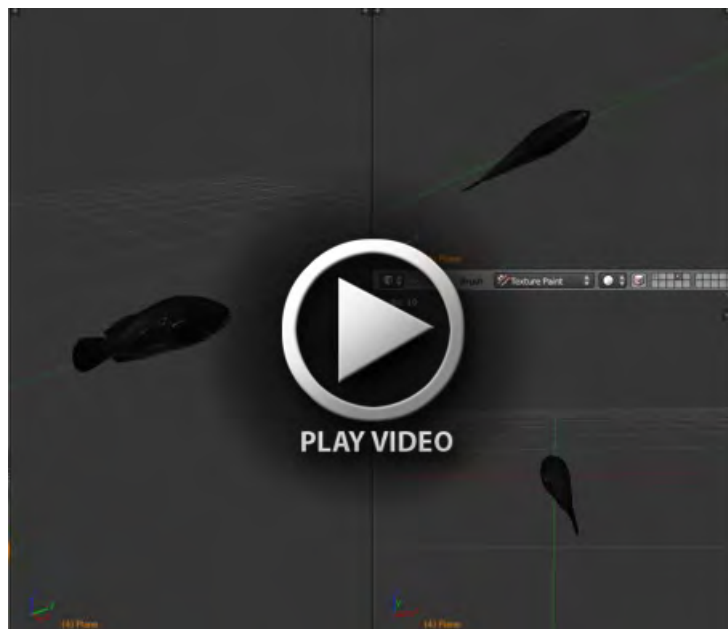

**Movie 4. The body motion during the intraspecific interaction (intra-attack), reconstructed through the 3-axis accelerations and 3-axis angular velocities datasets.** The data were taken at 200 Hz and the animation is played at 10 Hz. Note that the distance moved is not incorporated in the animation because the acceleration values are relatively low during intra-attack.

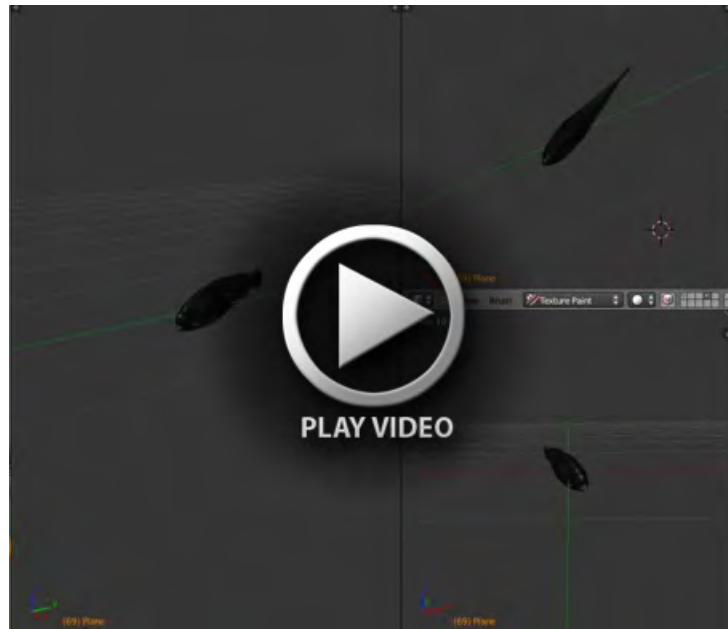

**Movie 5. The body motion during the intraspecific interaction (intra-escape), reconstructed through the 3-axis accelerations and 3-axis angular velocities datasets.** The data were taken at 200 Hz and the animation is played at 10 Hz. Note that the distance moved is not incorporated in the animation because the acceleration values are relatively low during intra-escape.

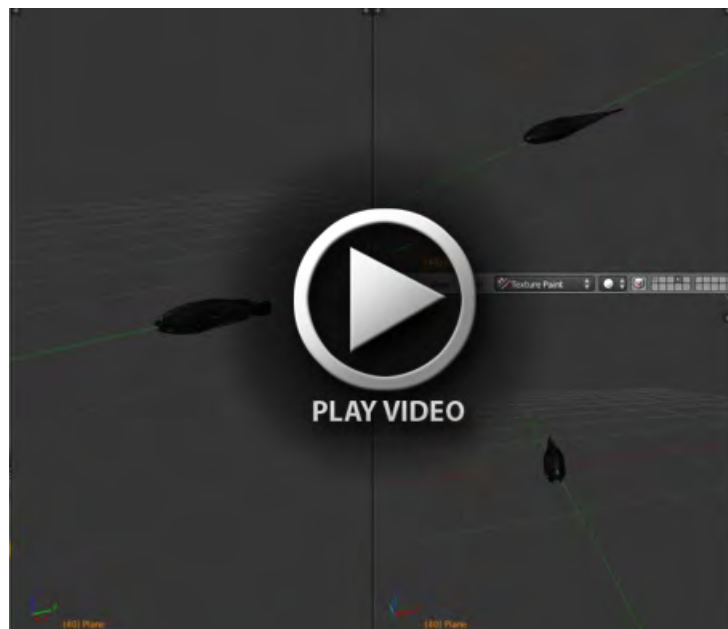

**Movie 6. The body motion during the routine movement (routine), reconstructed through the 3-axis accelerations and 3-axis angular velocities datasets.** The data were taken at 200 Hz and the animation is played at 10 Hz. Note that the distance moved is not incorporated in the animation because the acceleration values are relatively low during routine.

**Table S1. Summary of the behavioural data detected by the set threshold (2.0 G) for six white-streaked groupers, *Epinephelus ongus***

| <b>ID</b>    | <b>TL (mm)</b> | <b>BW (g)</b> | <b>Crab-eating</b> | <b>Fish-eating</b> | <b>Escape</b> | <b>Intra-attack</b> | <b>Intra-escape</b> | <b>Routine</b> |
|--------------|----------------|---------------|--------------------|--------------------|---------------|---------------------|---------------------|----------------|
| A            | 247            | 217           | 0/0                | 0/0                | 8/8           | 3/16                | 6/9                 | 0              |
| B            | 220            | 151           | 1/1                | 2/2                | 9/9           | 0/0                 | 10/22               | 1              |
| C            | 293            | 354           | 5/5                | 2/2                | 6/6           | 4/21                | 0/0                 | 3              |
| D            | 255            | 256           | 5/5                | 11/11              | 5/5           | 1/4                 | 3/4                 | 5              |
| E            | 245            | 219           | 2/2                | 1/1                | 7/7           | 0/1                 | 8/13                | 3              |
| F            | 261            | 297           | 4/4                | 18/18              | 7/7           | 1/6                 | 0/0                 | 4              |
| <b>Total</b> |                |               | <b>17/17</b>       | <b>34/34</b>       | <b>42/42</b>  | <b>9/48</b>         | <b>27/48</b>        | <b>16</b>      |

The numbers indicate the number of the detected behaviour (before the slash) and the number of the observed behaviour (after the slash).

TL, total length; BW, body weight; Crab-eating, feeding behaviour on crab; Fish-eating, feeding behaviour on fish; Escape, escape response; Intra-attack, intraspecific interaction (attack); Intra-escape, intraspecific interaction (escape); Routine, routine movement.

**Table S2. Summary of the means and standard errors of the parameters (maximum value, range, mean, standard deviation) derived from the 3-axis accelerations and 3-axis angular velocities in all behaviours**

| Phase         | Parameter |       | Crab-eating (n=17) |       |       | Fish-eating (n=34) |       |       | Escape (n=42) |       |      | Intra-attack (n=8) |       |      | Intra-escape (n=27) |       |      | Routine (n=16) |       |       | ANOVA   |         |
|---------------|-----------|-------|--------------------|-------|-------|--------------------|-------|-------|---------------|-------|------|--------------------|-------|------|---------------------|-------|------|----------------|-------|-------|---------|---------|
|               |           |       | mean               | s.e.m | TK    | mean               | s.e.m | TK    | mean          | s.e.m | TK   | mean               | s.e.m | TK   | mean                | s.e.m | TK   | mean           | s.e.m | TK    | F-value | P-value |
| Phase1        | AX (G)    | max   | 5.78               | 1.05  | a     | 8.95               | 0.70  | b     | 13.70         | 0.99  | c    | 3.10               | 0.79  | a    | 2.46                | 0.28  | a    | 2.75           | 0.40  | a     | 30.73   | <0.01   |
|               |           | range | 9.25               | 1.60  | a     | 14.74              | 0.92  | b     | 21.81         | 1.59  | c    | 4.40               | 1.10  | a    | 3.45                | 0.46  | a    | 4.25           | 0.64  | a     | 34.50   | <0.01   |
|               |           | mean  | 0.03               | 0.06  | a     | 0.09               | 0.04  | a     | 0.30          | 0.06  | b    | 0.13               | 0.08  | a    | 0.48                | 0.05  | b    | 0.17           | 0.07  | a     | 8.09    | <0.01   |
|               |           | s.d.  | 0.48               | 0.07  | a     | 0.84               | 0.06  | b     | 1.51          | 0.12  | c    | 0.27               | 0.06  | a    | 0.29                | 0.03  | a    | 0.26           | 0.03  | a     | 34.67   | <0.01   |
|               | AY (G)    | max   | 4.87               | 0.82  | a     | 9.02               | 0.62  | b     | 14.02         | 1.10  | c    | 3.10               | 1.37  | a    | 2.69                | 0.29  | a    | 3.27           | 0.75  | a     | 28.04   | <0.01   |
|               |           | range | 8.10               | 1.34  | a     | 13.90              | 0.92  | b     | 20.69         | 1.62  | c    | 4.35               | 1.62  | a    | 3.91                | 0.42  | a    | 5.04           | 1.01  | a     | 28.28   | <0.01   |
|               |           | mean  | -0.03              | 0.03  | b     | -0.15              | 0.03  | a     | 0.00          | 0.02  | ab   | -0.01              | 0.04  | bc   | 0.07                | 0.02  | b    | -0.04          | 0.05  | bc    | 8.33    | <0.01   |
|               |           | s.d.  | 0.45               | 0.06  | a     | 0.82               | 0.06  | b     | 1.43          | 0.13  | c    | 0.26               | 0.07  | a    | 0.29                | 0.03  | a    | 0.26           | 0.05  | a     | 26.49   | <0.01   |
|               | AZ (G)    | max   | 4.61               | 0.62  | ab    | 6.98               | 0.63  | b     | 9.72          | 0.83  | c    | 2.13               | 0.25  | a    | 2.33                | 0.23  | a    | 3.72           | 0.64  | ab    | 18.16   | <0.01   |
|               |           | range | 7.94               | 1.23  | ab    | 11.98              | 1.08  | b     | 16.20         | 1.41  | c    | 2.54               | 0.49  | a    | 3.02                | 0.43  | a    | 5.83           | 1.16  | ab    | 19.39   | <0.01   |
|               |           | mean  | 0.87               | 0.03  | -     | 0.90               | 0.01  | -     | 0.84          | 0.02  | -    | 0.94               | 0.01  | -    | 0.88                | 0.02  | -    | 0.71           | 0.17  | -     | 1.70    | 0.14    |
|               |           | s.d.  | 0.45               | 0.06  | ab    | 0.66               | 0.05  | b     | 1.02          | 0.10  | c    | 0.16               | 0.03  | a    | 0.23                | 0.03  | a    | 0.34           | 0.05  | ab    | 18.30   | <0.01   |
| MA (G)        | max       | 7.29  | 1.24               | a     | 12.01 | 0.82               | b     | 18.41 | 1.32          | c     | 5.23 | 1.23               | a     | 3.87 | 0.34                | a     | 5.30 | 0.93           | a     | 28.73 | <0.01   |         |
|               | range     | 6.88  | 1.24               | a     | 11.46 | 0.83               | b     | 17.91 | 1.33          | c     | 4.70 | 1.26               | a     | 3.21 | 0.35                | a     | 4.71 | 0.96           | a     | 28.79 | <0.01   |         |
|               | mean      | 1.06  | 0.03               | a     | 1.22  | 0.03               | a     | 1.58  | 0.07          | b     | 1.04 | 0.01               | a     | 1.13 | 0.01                | a     | 1.08 | 0.05           | a     | 18.11 | <0.01   |         |
|               | s.d.      | 0.61  | 0.10               | a     | 1.13  | 0.08               | b     | 1.99  | 0.18          | c     | 0.28 | 0.07               | a     | 0.26 | 0.03                | a     | 0.37 | 0.06           | a     | 29.00 | <0.01   |         |
| GX (degree/s) | max       | 895   | 117                | ab    | 1048  | 69                 | bc    | 1248  | 104           | c     | 282  | 66                 | a     | 464  | 53                  | a     | 733  | 130            | ab    | 12.12 | <0.01   |         |
|               | range     | 1540  | 219                | ab    | 1610  | 98                 | b     | 2119  | 202           | c     | 443  | 111                | a     | 729  | 81                  | a     | 1211 | 227            | ab    | 10.91 | <0.01   |         |
|               | mean      | 8     | 2                  | -     | 1     | 2                  | -     | 1     | 4             | -     | -4   | 3                  | -     | 5    | 4                   | -     | 5    | 3              | -     | 0.78  | 0.57    |         |

|        |               |       |       |      |    |       |      |    |      |      |    |      |      |     |      |      |    |       |      |     |       |       |
|--------|---------------|-------|-------|------|----|-------|------|----|------|------|----|------|------|-----|------|------|----|-------|------|-----|-------|-------|
|        |               | s.d.  | 102   | 14   | a  | 104   | 7    | a  | 167  | 18   | b  | 36   | 7    | a   | 78   | 8    | a  | 69    | 11   | a   | 9.30  | <0.01 |
|        | GY (degree/s) | max   | 1380  | 139  | ab | 2089  | 132  | cd | 2078 | 157  | d  | 572  | 97   | ab  | 529  | 60   | a  | 1382  | 245  | bc  | 19.33 | <0.01 |
|        |               | range | 2411  | 250  | ab | 3678  | 256  | d  | 3636 | 279  | d  | 896  | 189  | ab  | 830  | 97   | a  | 2289  | 409  | bc  | 20.01 | <0.01 |
|        |               | mean  | 3     | 4    | -  | 2     | 2    | -  | 6    | 3    | -  | -4   | 5    | -   | 0    | 2    | -  | 1     | 2    | -   | 1.21  | 0.31  |
|        |               | s.d.  | 149   | 13   | a  | 226   | 14   | b  | 264  | 18   | b  | 69   | 10   | a   | 85   | 8    | a  | 130   | 19   | a   | 22.45 | <0.01 |
|        | GZ (degree/s) | max   | 544   | 59   | a  | 1306  | 105  | b  | 2383 | 182  | c  | 463  | 95   | a   | 627  | 62   | a  | 465   | 80   | a   | 32.60 | <0.01 |
|        |               | range | 902   | 94   | a  | 1686  | 113  | a  | 3634 | 304  | b  | 600  | 121  | a   | 872  | 81   | a  | 691   | 115  | a   | 31.74 | <0.01 |
|        |               | mean  | -3    | 7    | -  | -6    | 8    | -  | -23  | 11   | -  | -4   | 11   | -   | -9   | 7    | -  | -1    | 6    | -   | 0.85  | 0.51  |
|        |               | s.d.  | 86    | 10   | a  | 154   | 12   | b  | 322  | 22   | c  | 74   | 17   | ab  | 112  | 11   | ab | 55    | 9    | a   | 34.93 | <0.01 |
|        | MG (degree/s) | max   | 1569  | 166  | a  | 2559  | 133  | b  | 2997 | 204  | b  | 746  | 109  | a   | 885  | 75   | a  | 1583  | 279  | a   | 23.99 | <0.01 |
|        |               | range | 1563  | 166  | a  | 2553  | 133  | b  | 2988 | 204  | b  | 739  | 109  | a   | 876  | 75   | a  | 1580  | 279  | a   | 24.01 | <0.01 |
|        |               | mean  | 99    | 13   | a  | 112   | 8    | a  | 219  | 16   | b  | 69   | 13   | a   | 113  | 11   | a  | 57    | 7    | a   | 21.12 | <0.01 |
|        |               | s.d.  | 178   | 16   | a  | 281   | 16   | b  | 406  | 27   | b  | 94   | 14   | a   | 126  | 10   | a  | 155   | 20   | a   | 29.47 | <0.01 |
| Phase2 | AX (G)        | max   | 2.66  | 1.09 | -  | 0.98  | 0.29 | -  | 1.96 | 0.45 | -  | 0.90 | 0.46 | -   | 1.28 | 0.51 | -  | 0.35  | 0.06 | -   | 1.90  | 0.10  |
|        |               | range | 3.99  | 1.65 | b  | 1.40  | 0.51 | ab | 2.48 | 0.64 | ab | 1.33 | 0.84 | ab  | 1.26 | 0.78 | ab | 0.18  | 0.03 | a   | 1.98  | 0.08  |
|        |               | mean  | 0.01  | 0.07 | ab | 0.02  | 0.04 | a  | 0.24 | 0.06 | bc | 0.12 | 0.07 | abc | 0.40 | 0.08 | c  | 0.14  | 0.09 | abc | 5.14  | <0.01 |
|        |               | s.d.  | 0.21  | 0.05 | b  | 0.13  | 0.02 | ab | 0.24 | 0.04 | b  | 0.16 | 0.05 | ab  | 0.11 | 0.03 | ab | 0.04  | 0.01 | a   | 3.68  | <0.01 |
|        | AY (G)        | max   | 1.56  | 0.63 | -  | 0.97  | 0.39 | -  | 1.56 | 0.49 | -  | 0.83 | 0.66 | -   | 0.52 | 0.25 | -  | 0.23  | 0.04 | -   | 1.26  | 0.29  |
|        |               | range | 2.46  | 0.98 | -  | 1.49  | 0.65 | -  | 2.19 | 0.71 | -  | 1.04 | 0.79 | -   | 0.69 | 0.32 | -  | 0.13  | 0.03 | -   | 1.38  | 0.23  |
|        |               | mean  | -0.04 | 0.02 | a  | -0.08 | 0.02 | a  | 0.11 | 0.01 | b  | 0.00 | 0.02 | ab  | 0.05 | 0.01 | b  | -0.10 | 0.05 | a   | 15.39 | <0.01 |
|        |               | s.d.  | 0.13  | 0.04 | -  | 0.10  | 0.03 | -  | 0.16 | 0.03 | -  | 0.09 | 0.04 | -   | 0.09 | 0.02 | -  | 0.03  | 0.01 | -   | 1.66  | 0.15  |
|        | AZ (G)        | max   | 3.66  | 1.22 | -  | 1.36  | 0.15 | -  | 1.59 | 0.21 | -  | 1.36 | 0.24 | -   | 1.86 | 0.76 | -  | 0.94  | 0.04 | -   | 2.46  | <0.05 |
|        |               | range | 4.60  | 1.87 | b  | 0.93  | 0.35 | ab | 1.49 | 0.37 | ab | 0.81 | 0.46 | ab  | 1.74 | 1.31 | ab | 0.11  | 0.03 | a   | 2.29  | <0.05 |

|               |       |      |      |     |      |      |    |      |      |    |      |      |    |      |      |    |       |      |   |      |       |
|---------------|-------|------|------|-----|------|------|----|------|------|----|------|------|----|------|------|----|-------|------|---|------|-------|
|               | mean  | 0.89 | 0.02 | ab  | 0.94 | 0.01 | b  | 0.85 | 0.02 | ab | 0.95 | 0.01 | ab | 0.91 | 0.01 | ab | 0.75  | 0.12 | a | 2.76 | <0.05 |
|               | s.d.  | 0.21 | 0.07 | b   | 0.07 | 0.02 | a  | 0.12 | 0.02 | ab | 0.06 | 0.02 | ab | 0.10 | 0.04 | ab | 0.03  | 0.01 | a | 2.42 | <0.05 |
| MA (G)        | max   | 4.08 | 1.39 | -   | 1.92 | 0.43 | -  | 2.82 | 0.57 | -  | 1.74 | 0.58 | -  | 2.07 | 0.79 | -  | 10.99 | 0.03 | - | 1.57 | 0.17  |
|               | range | 3.40 | 1.44 | -   | 1.09 | 0.45 | -  | 2.02 | 0.59 | -  | 0.89 | 0.59 | -  | 1.13 | 0.82 | -  | 16.75 | 0.03 | - | 1.73 | 0.13  |
|               | mean  | 0.98 | 0.03 | a   | 1.00 | 0.01 | a  | 1.04 | 0.02 | ab | 1.01 | 0.01 | ab | 1.09 | 0.01 | b  | 0.60  | 0.01 | a | 6.89 | <0.01 |
|               | s.d.  | 0.23 | 0.09 | -   | 0.09 | 0.03 | -  | 0.16 | 0.04 | -  | 0.07 | 0.05 | -  | 0.08 | 0.05 | -  | 2.93  | 0.01 | - | 1.66 | 0.15  |
| GX (degree/s) | max   | 429  | 157  | b   | 142  | 51   | ab | 196  | 55   | ab | 74   | 32   | ab | 191  | 90   | ab | 1     | 2    | a | 2.26 | 0.05  |
|               | range | 710  | 258  | b   | 244  | 91   | ab | 325  | 83   | ab | 115  | 52   | ab | 251  | 106  | a  | 0     | 3    | a | 2.72 | 0.02  |
|               | mean  | 2    | 1    | -   | 2    | 1    | -  | -1   | 1    | -  | 1    | 2    | -  | 5    | 4    | -  | 1     | 1    | - | 1.47 | 0.20  |
|               | s.d.  | 39   | 13   | b   | 19   | 5    | ab | 32   | 6    | b  | 10   | 3    | ab | 29   | 6    | b  | 0     | 0    | a | 3.16 | <0.01 |
| GY (degree/s) | max   | 593  | 203  | b   | 207  | 60   | ab | 310  | 96   | ab | 208  | 137  | ab | 159  | 68   | a  | 19    | 5    | a | 2.56 | <0.05 |
|               | range | 995  | 342  | b   | 357  | 109  | a  | 525  | 160  | ab | 378  | 259  | ab | 264  | 119  | a  | 33    | 9    | a | 2.48 | <0.05 |
|               | mean  | -3   | 2    | -   | -3   | 1    | -  | 3    | 1    | -  | -2   | 3    | -  | -1   | 2    | -  | -1    | 1    | - | 2.49 | <0.05 |
|               | s.d.  | 61   | 18   | b   | 31   | 7    | a  | 51   | 9    | b  | 29   | 13   | ab | 26   | 6    | ab | 6     | 1    | a | 3.49 | <0.01 |
| GZ (degree/s) | max   | 228  | 75   | ab  | 178  | 47   | ab | 320  | 73   | b  | 222  | 113  | ab | 216  | 79   | ab | 17    | 2    | a | 1.72 | 0.13  |
|               | range | 336  | 119  | ab  | 235  | 62   | ab | 495  | 115  | b  | 290  | 133  | ab | 298  | 103  | ab | 25    | 4    | a | 2.07 | 0.07  |
|               | mean  | 5    | 4    | -   | 1    | 5    | -  | -1   | 4    | -  | 2    | 6    | -  | 3    | 5    | -  | -2    | 1    | - | 0.25 | 0.94  |
|               | s.d.  | 31   | 8    | abc | 31   | 5    | ab | 58   | 9    | c  | 41   | 13   | ab | 44   | 9    | b  | 5     | 1    | a | 3.96 | <0.01 |
| MG (degree/s) | max   | 746  | 248  | b   | 264  | 73   | ab | 472  | 127  | ab | 293  | 164  | ab | 317  | 136  | ab | 25    | 5    | a | 2.23 | 0.05  |
|               | range | 742  | 248  | b   | 260  | 73   | ab | 467  | 127  | ab | 290  | 164  | ab | 314  | 135  | ab | 24    | 5    | a | 2.23 | 0.06  |
|               | mean  | 39   | 7    | bc  | 38   | 5    | b  | 62   | 7    | c  | 34   | 9    | bc | 50   | 8    | bc | 9     | 1    | a | 5.96 | <0.01 |
|               | s.d.  | 75   | 22   | b   | 39   | 9    | ab | 63   | 12   | b  | 44   | 16   | ab | 46   | 10   | ab | 5     | 1    | a | 2.75 | <0.05 |

Different lower case letters in TK represent significant differences detected by a Tukey-Kramer *post hoc* test ( $P<0.05$ ).



Crab-eating, feeding behaviour on crab; Fish-eating, feeding behaviour on fish; Escape, escape response; Intra-attack, intraspecific interaction (attack); Intra-escape, intraspecific interaction (escape); Routine, routine movement; ANOVA, analysis of variance; s.e.m, standard error; TK, Tukey-Kramer test; s.d., standard deviation; AX, lateral acceleration; AY, forward acceleration; AZ, vertical acceleration; MA, vector sum of the accelerations; GX, pitch angular velocity; GY, roll angular velocity; GZ, yaw angular velocity; MG, vector sum of the angular velocities

**Table S3. Summary of the stomach content analysis of 158 white-streaked groupers, *Epinephelus ongus* (252±26 mm total length)**

| <b>Prey types</b>  | <b>Family</b> | <b>N</b>  | <b>W (g)</b>  | <b>F</b>  |
|--------------------|---------------|-----------|---------------|-----------|
| <b>Crustaceans</b> |               | <b>27</b> | <b>50.53</b>  | <b>21</b> |
| Crabs              | Portunidae    | 12        | 39.005        | 10        |
|                    | Xanthidae     | 4         | 2.82          | 4         |
|                    | Majoidae      | 1         | 0.08          | 1         |
| Shrimps            | Hippolytidae  | 8         | 6.555         | 7         |
|                    | Alpheidae     | 1         | 1.02          | 1         |
|                    | Unidentified  | 1         | 1.05          | 1         |
| <b>Fishes</b>      |               | <b>14</b> | <b>41.16</b>  | <b>14</b> |
|                    | Pomacentridae | 4         | 12.58         | 4         |
|                    | Labridae      | 1         | 10.47         | 1         |
|                    | Holocentridae | 1         | 0.48          | 1         |
|                    | Pemppheridae  | 1         | 4.5           | 1         |
|                    | Lutjanidae    | 1         | 7.16          | 1         |
|                    | Unidentified  | 6         | 5.97          | 6         |
| <b>Others</b>      |               | <b>1</b>  | <b>18.69</b>  | <b>1</b>  |
| Octopus            | Unidentified  | 1         | 18.69         | 1         |
| <b>Total</b>       |               | <b>42</b> | <b>110.38</b> | <b>33</b> |

Thirty three individuals had some prey items in their stomachs.

N, total number; W, total weight; F, frequency of occurrence

**Script 1.** The custom R program to find the optimal thresholds of the parameters using the sum of sensitivity and specificity.

```
#####  
## Note that rather than the conventional "<=", we use "=" as the  
## assignment operator.  
#####  
  
### 1. Finding the start-point for data extraction ###  
  
# Read the time-series data (3-axis accelerations and 3-axis  
# angular velocities) from the data file. The data file is a comma  
# separated file, has 7 columns of values, and each column is assigned  
# to a variable. The variable names are "point" (sequential serial number),  
# "ax" (lateral acceleration), "ay" (forward acceleration)  
# "az" (vertical acceleration), "gx" (pitch angular velocity)  
# "gy" (roll angular velocity), "gz" (yaw angular velocity)  
  
original = read.csv("data1.csv")  
  
# calculations of the vector sum of accelerations ("ma") and  
# angular velocities ("mg")  
  
original$ma = sqrt(original$ax^2 + original$ay^2 + original$az^2)  
original$mg = sqrt(original$gx^2 + original$gy^2 + original$gz^2)  
  
# find the maximum absolute value in the 3-axis accelerations  
  
temp1 = data.frame(abs(original$ax),  
                   abs(original$ay),  
                   abs(original$az))  
original$max3 = apply(temp1, 1, max)  
  
## find the start-point and save to a csv file after looping over  
## nrow(pointdata)-1.  
filename1 = "startpoint.csv"
```

```

pointdata = original[original$max3 > 2,]
  # We set the max3 to > 2, because all the feeding behaviours
  # exceeded the absolute 2.0 G in at least one of the three axes.
out = paste("startpoint", sep = ",")
write(out, file = filename1, append = TRUE)
out = paste(pointdata[1, 1] + 1, sep = ",")
write(out, file = filename1, append = TRUE)

index = 0
for(i in 1:(nrow(pointdata) - 1)){
  if (index <= 1000){
    # We set the index to <= 1000, because we want to extract
    # 5 seconds of the data (200Hz * 5 sec = 1000 data points)
    index = index + pointdata[i + 1, 1] - pointdata[i, 1]
  }
  else{
    out = paste(pointdata[i + 1, 1] + 1, sep = ",")
    write(out, file = filename1, append = TRUE)
    index = 0
  }
}

### the end of 1 ###

### 2. Calculating the parameters ###
# The following packages are required.
require(e1071)
require(stringr)
require(plyr)
require(reshape2)

# Custom functions for parameter calculations
absmax = function(x){
  max(abs(x))
}

```

```

range = function(x){
  max(x) - min(x)
}

fn1 = function(x) c(
  absmax = absmax(x),
  range = range(x),
  avg = mean(x),
  sd = sd(x),
  a2 = 1
)

pointdata = read.csv(filename1)

for(i in 1:(nrow(pointdata))) {
  startpoint = pointdata[i, "startpoint"]
  if(startpoint + 999 < nrow(original)) {

    # Parameter calculations for the first phase
    timeseries = original[startpoint:(startpoint + 419),]
    # We set 419 here because we wanted to extract 0 ~ 2.1 seconds
    # of the data (200Hz * 2.1 sec = 420 data points)
    timeseries = timeseries[c("ax", "ay", "az", "gx",
                              "gy", "gz", "ma", "mg")]
    output = data.frame(aapply(t(timeseries), 1, fn1))
    output$names = row.names(output)
    output = reshape(output, idvar = "a2", timevar="names",
                     direction="wide")

    # Parameter calculations for the second phase
    timeseries2 = original[(startpoint + 420):(startpoint + 999),]
    # We set 420 and 999 here because we wanted to extract 2.1 ~ 5
    # seconds of the data
    timeseries2 = timeseries2[c("ax", "ay", "az", "gx", "gy",
                               "gz", "ma", "mg")]
  }
}

```

```

output2 = data.frame(aapply(t(timeseries2), 1, fn1))
output2$names = row.names(output2)
output2 = reshape(output2, idvar = "a2", timevar="names",
                  direction="wide")

out = data.frame(output[2:ncol(output)], output2[2:ncol(output2)])
out$startpoint = startpoint
write.table(out, file = "parameters.csv",
           row.names = FALSE, col.names = FALSE, append = TRUE,
           quote = FALSE, sep = ",")
}
}

### the end of 2 ###

### 3. Calculating the sum of sensitivity and specificity to find
### the optimal thresholds

# Read the datasets (fish ID, behavioral data that were determined by
# the video, and calculated parameters are needed).

# Here, our datasets have "fish" ("a"~"f"), "behavior"
# (Fc, Feeding-crab; Ff, Feeding-fish; Es, Escape; Ia, Intra-attack;
# Ie, Intra-escape; Rm, Routine movements) , "gxgyrange" (the ratio of
# the range of pitch angular velocity to the range of yaw angular
# velocity in the first phase), "avgmg2" (the mean vector sum of the
# angular velocities in the second phase), "sdax" (the standard
# deviation of the lateral acceleration in the first phase), and
# "gzgyrange" (the ratio of the range of yaw angular velocity to the
# range of roll angular velocity in the first phase).

test = read.csv("data2.csv")

# Separating the modeling data and test data.
# If you want to conduct the cross validation test, then use different

```

```

# fish IDs for the "model" and "testafter"
model = test[test$fish == "a" | test$fish == "b" | test$fish == "c" |
             test$fish == "d" | test$fish == "e" | test$fish=="f", ]
testafter = test[test$fish == "a" | test$fish == "b" |
                 test$fish == "c" | test$fish == "d" |
                 test$fish == "e" | test$fish == "f", ]

## 3.1. Calculating the sum of sensitivity + specificity
## for Feeding-crab
fname = "mapfc.csv"
out = paste("b1", "b2", "sens", "spec", "youden", sep = ",")
write(out, file = fname, append = TRUE)

for(i in 1:100){
  b1 = 0.02 * i
  # change the "gxgyrange" cut-off value from 0.02 to 2.00 to find the
  # optimal threshold
  a = model[model$gxgyrange >= b1,]
  if(nrow(a) >= 1){
    a$node1 = 1
  }
  b = model[model$gxgyrange < b1,]
  if(nrow(b) >= 1){
    b$node1 = 0
  }
  model2 = rbind(a, b)

  for(j in 1:100){
    b2 = 0.5 * j
    # change the "avgmg2" cut-off value from 0.5 to 50 to find the
    # optimal value
    a = model2[model2$avgmg2 >= b2,]
    if (nrow(a) >= 1){
      a$node2 = 1
    }
  }
}

```

```

}
b = model2[model2$avgmg2 < b2,]
if(nrow(b) >= 1){
  b$node2 = 0
}
model3 = rbind(a, b)

a = model3[model3$node1 * model3$node2 == 1,]
if(nrow(a) >= 1){
  a$estimateFc = "Fc"
}
b = model3[model3$node1 * model3$node2 == 0,]
if(nrow(b) >= 1){
  b$estimateFc = "0"
}
model4 = rbind(a, b)
# calculation of the sensitivity
sens = nrow(model4[model4$behavior == "Fc" &
                  model4$estimateFc == "Fc",]) /
  nrow(model4[model4$behavior == "Fc",])
# calculation of the specificity
spec = nrow(model4[model4$behavior != "Fc" &
                  model4$estimateFc != "Fc",]) /
  nrow(model4[model4$behavior != "Fc",])
youden = sens + spec
out = paste(b1, b2, sens, spec, youden, sep = ",")
write(out, file = fcname, append = TRUE)
}
}

# extracting the optimal thresholds
mapfc = read.csv(fcname)
M = max(mapfc$youden)
a = which(mapfc$youden == M)
# the optimal threshold of "gxgyrange"
cutb1=mean(mapfc[a, "b1"])

```



```

# the optimal threshold of "avgmg2"
cutb2=mean(mapfc[a, "b2"])

# mapping the sum of sensitivity and specificity against the
# "gxgyrange" and "avgmg2"
mapfc = matrix(mapfc$youden, nrow = 100)
mapfc = t(mapfc)
x = 1:nrow(mapfc)
y = 1:ncol(mapfc)
filled.contour(x, y, mapfc)

## the end of 3.1 ##

## 3.2. Calculating the sum of sensitivity + specificity for
# Feeding-fish
ffname = "mapff.csv"
out = paste("b1", "b2", "sens", "spec", "youden", sep = ",")
write(out, file = ffname, append = TRUE)

for(i in 1:100){
  # change the "sdax" cut-off value from 0.02 to 2.00 to find the
  # optimal threshold
  b1 = 0.02 * i
  a = model[model$sdax >= b1,]
  if(nrow(a) >= 1){
    a$node1 = 1
  }

  b = model[model$sdax < b1,]
  if(nrow(b) >= 1){
    b$node1 = 0
  }
  model2 = rbind(a, b)

  for(j in 1:100){
    # change the "gzgyrange" cut-off value from 0.02 to 2.00 to find

```

```

# the optimal threshold
b2 = 0.02 * j
a = model2[model2$gzgyrange <= b2,]
if(nrow(a) >= 1){
  a$node2 = 1
}
b = model2[model2$gzgyrange > b2,]
if(nrow(b) >= 1){
  b$node2 = 0
}
model3 = rbind(a, b)
a = model3[model3$node1*model3$node2 == 1,]
if(nrow(a) >= 1){
  a$estimateFf = "Ff"
}
b = model3[model3$node1*model3$node2 == 0,]
if(nrow(b) >= 1){
  b$estimateFf = "0"
}

model4 = rbind(a, b)
# calculation of the sensitivity
sens = nrow(model4[model4$behavior == "Ff" &
  model4$estimateFf == "Ff",]) /
  nrow(model4[model4$behavior == "Ff",])
# calculation of the specificity
spec = nrow(model4[model4$behavior != "Ff" &
  model4$estimateFf != "Ff",]) /
  nrow(model4[model4$behavior != "Ff",])
youden = sens + spec
out = paste(b1, b2, sens, spec, youden, sep = ",")
write(out, file = ffname, append = TRUE)
}
}

# extracting the optimal thresholds

```

```
mapff = read.csv(ffname)
M = max(mapff$youden)
a = which(mapff$youden == M)
# the optimal threshold of "sdax"
cutb1 = mean(mapff[a, "b1"])
# the optimal threshold of "gzgyrange"
cutb2 = mean(mapff[a, "b2"])

# mapping the sum of sensitivity and specificity against the "sdax"
# and "gzgyrange"
mapff = matrix(mapff$youden, nrow = 100)
mapff = t(mapff)
x = 1:nrow(mapff)
y = 1:ncol(mapff)
filled.contour(x, y, mapff)

## the end of 3.2 ##
### the end of 3 ###
```
